# Supplementary material for: Construction of cross-linked polymer films covalently attached on silicon substrate via a self-assembled monolayer
Source: Royal Society of Chemistry journal article supplement (doi:10.1039/c3ra40949j), 2013-01-01
Supplement: c3ra40949j.pdf [file c3ra40949j.pdf]

## Supporting Information for

### Construction of cross-linked polymer films covalently attached on silicon substrate via a self-assembled monolayer

Zhi Zheng<sup>a,\*</sup>, Hongxiao Zhao<sup>a</sup>, Wenjun Fa<sup>a</sup>, Weiwei He<sup>a</sup>, Ka-wai Wong<sup>bc</sup>, Raymund

W.M. Kwok<sup>b</sup>, Woon Ming Lau<sup>bc,\*</sup>

<sup>a</sup>Key Laboratory of Micro-Nano Materials for Energy Storage and Conversion of  
Henan Province, Institute of Surface Micro and Nano Materials, Xuchang University,

Henan Province, 461000, China,

<sup>b</sup>Chengdu Green Energy and Green Manufacturing R&D Center, Sichuan, 610207,

China

<sup>c</sup>Department of Physics, The Chinese University of Hong Kong, Shatin, N. T., China,

\*Address correspondence to these authors. E-mail [zhengzhi99999@gmail.com](mailto:zhengzhi99999@gmail.com), [llau22@uwo.ca](mailto:llau22@uwo.ca)

Generally, the characterization of film thickness was performed by using the XPS analysis. For a uniform organic thin film spun cast on a certain substrate with the thickness of  $d$ , the photoelectron intensity of a specific core level of element  $i$  from the overlayer is given by

$$I_{i, \text{overlayer}} = \int_0^d P D C_i T_i \sigma_i e^{-\frac{z}{\lambda_{i, \text{overlayer}} \cos \theta}} dz,$$

where  $d$  is the thickness of the overlayer,  $c_i$  is the atomic concentration of element  $i$  in the overlayer,  $T_i$  is the spectrometer transmission for the kinetic energy of the photoelectrons from the specific core level of element  $i$ ,  $\sigma_i$  is the atomic photoemissions cross section of element  $i$ , and  $\lambda_{i, \text{overlayer}}$  is the IMFP of the photoelectrons passing through the overlayer.

Moreover, when the photoelectrons of element  $j$  in the underlying substrate traverse the overlayer, the corresponding photoelectron intensity is given by

$$I_{j, \text{substrate}} = \int_0^{\infty} P D C_j T_j \sigma_j e^{-\frac{t}{\lambda_{j, \text{substrate}} \cos \theta}} e^{-\frac{d}{\lambda_{j, \text{overlayer}} \cos \theta}} dt$$

where  $c_j$  is the atomic concentration of element  $j$  in the substrate,  $T_j$  is the spectrometer transmission for the kinetic energy of the photoelectrons from the specific core level of element  $j$ .  $\lambda_{j, \text{substrate}}$  and  $\lambda_{j, \text{overlayer}}$  are the IMFPs of the photoelectrons passing through the substrate and overlayer from the specific core level of element  $j$  respectively.

The above two equations can be further solved to calculate the ratio of photoelectron intensity of an overlayer element to that of a substrate element, and the overlayer thickness ( $d$ ) can then be well estimated by solving the following equation in which a Microsoft Excel is needed here.

$$\frac{I_{i, \text{overlayer}}}{I_{j, \text{substrate}}} = \frac{C_i}{C_j} \cdot \frac{T_i \sigma_i}{T_j \sigma_j} \cdot \frac{\lambda_{i, \text{overlayer}}}{\lambda_{j, \text{substrate}}} \cdot \frac{1 - e^{-\frac{d}{\lambda_{i, \text{overlayer}} \cos \theta}}}{e^{-\frac{d}{\lambda_{j, \text{overlayer}} \cos \theta}}}$$

We have introduced our PCIC method in details in our previous published research articles in details [References 15,16,17]. Actually, the comparison of the relative peak intensity of C1s and Si2p can already be a judgement/estimation of the thickness change between films before and after each ultrasonication treatment.
